# Supplementary material for: In-frame deletion in canine PITRM1 is associated with a severe early-onset epilepsy, mitochondrial dysfunction and neurodegeneration
Source: Hum Genet. 2021 Apr 9;140(11):1593–609. doi: 10.1007/s00439-021-02279-y (PMC8519929; doi:10.1007/s00439-021-02279-y)
Supplement: Supplementary file 7 — Online Resource 7. The case-specific structural variants and mobile element insertions [file 439_2021_2279_MOESM7_ESM.xlsx]

## Sheet: PRT_epil_1case_290controls_SV_C
Online Resource 7. The case-specific structural variants and mobile element insertions. The variants residing within mapped ROH are highlighted in blue.
CHROM	POS	REF	SV TYPE	Func.ensGene	Gene.ensGene	Func.refGene	Gene.refGene
chr2	36022200	T	L1Y	intronic	PCDHA13	intronic	LOC111089960;LOC111091918;LOC478037
chr2	41693278	T	DEL	splicing	DPYSL3	splicing	DPYSL3
chr2	45290484	G	DEL	upstream	ENSCAFG00000040816	ncRNA_intronic	LOC111094652
chr2	60383283	A	DEL	intergenic	SLC6A2;LPCAT2	intergenic	SLC6A2;LPCAT2
chr4	63528831	G	DEL	intergenic	ENSCAFG00000048545;ISL1	ncRNA_intronic	LOC102157144
chr4	74515164	T	DEL	exonic	ENSCAFG00000042031	intergenic	LOC102154842;LOC100683429
chr4	74598650	C	DEL	ncRNA_intronic	ENSCAFG00000041475	ncRNA_intronic	LOC111095653
chr5	85195461	C	DEL	intergenic	ENSCAFG00000044292;ENSCAFG00000046510	intergenic	LOC111096133;LOC106558851
chr7	24032014	T	DEL	intronic	TNR	intronic	TNR
chr9	57957750	T	DEL	intronic	SCAI	intronic	SCAI
chr11	36626751	T	SINEC	intronic	BNC2	intronic	BNC2
chr11	37044283	T	L1Y	intergenic	ENSCAFG00000032537;CNTLN	intergenic	LOC102155954;CNTLN
chr11	37257564	T	L1Y	exonic	CNTLN	exonic	CNTLN
chr11	38881657	G	DEL	intergenic	SAXO1;RRAGA	intergenic	LOC111098060;RRAGA
chr11	42021359	C	DEL	intergenic	ENSCAFG00000041211;ENSCAFG00000034177	intergenic	LOC102153298;LOC100686786
chr13	14672621	A	DEL	intergenic	ENSCAFG00000043806;U6	intergenic	LOC100684001;LOC111098482
chr14	34450407	T	SINEC	intergenic	ITGB8;ENSCAFG00000046056	intergenic	ITGB8;LOC111098790
chr17	26303131	A	DEL	intronic	LTBP1	intronic	LTBP1
chr17	27418760	T	SINEC	ncRNA_intronic	ENSCAFG00000047269	ncRNA_intronic	LOC102152201
chr17	34348530	C	DEL	intergenic	ENSCAFG00000041051;NEURL3	intergenic	LOC102152163;NEURL3
chr17	37937853	C	DEL	intronic	EIF2AK3	intronic	EIF2AK3
chr18	30504446	C	DEL	intergenic	ENSCAFG00000049839;ENSCAFG00000049261	intergenic	LOC111090810;LOC102151911
chr21	21829508	A	DEL	intronic	ACER3	intronic	ACER3
chr22	42865616	T	SINEC	intronic	GPC5	intronic	GPC5
chr23	9256788	T	SINEC	intergenic	ENSCAFG00000033102;ENSCAFG00000041377	intergenic	MOBP;LOC102154528
chr23	43900822	A	DEL	intronic	HLTF	intronic	HLTF
chr24	7002914	A	INS	intronic	MACROD2	intronic	MACROD2
chr24	26398979	G	DEL	intronic	CTNNBL1	intronic	CTNNBL1
chr25	1915038	A	SINEC	intergenic	LHFPL6;NHLRC3	intergenic	LOC111092426;LOC102154473
chr25	6977540	T	DEL	intronic	STARD13	intronic	STARD13
chr25	19333803	A	L1Y	intronic	PALLD	intronic	PALLD
chr25	21443696	A	DEL	intergenic	U6;ENSCAFG00000007743	intergenic	LOC100688695;LOC111092440
chr25	24440424	G	DEL	intergenic	U4;ENSCAFG00000046721	intergenic	LOC102155473;LOC111092410
chr25	25293909	T	DEL	intronic	GLRA3	intronic	GLRA3
chr27	22863673	G	INS	ncRNA_intronic	ENSCAFG00000039209	intronic	SOX5
chr32	4759845	T	INS	intronic	CFAP299	ncRNA_intronic	LOC111093683
chr35	22360039	A	DEL	intronic	DCDC2	ncRNA_intronic	LOC111093997
chr36	8796650	G	SINEC	intergenic	ENSCAFG00000049046;ENSCAFG00000041327	intergenic	LOC111094261;LOC111094268
chr36	21232551	T	SINEC	intronic	AGPS	intronic	AGPS
chr38	19343807	A	DEL	ncRNA_intronic	ENSCAFG00000049705	downstream	LOC111094595
chrX	2453071	C	DEL	intergenic	ENSCAFG00000011192;ENSCAFG00000048404	intergenic	LOC111094849;LOC111094843
chrX	12172761	T	SINEC	intergenic	ENSCAFG00000039128;ENSCAFG00000012233	intergenic	AP1S2;LOC611472
chrX	57501027	G	BND	intergenic	ENSCAFG00000041651;MIR421	intergenic	LOC102157030;LOC100856087
chrX	57501027	G	BND	intronic	GALNTL6	intronic	GALNTL6
chrX	74486199	A	DEL	intergenic	TNMD;TSPAN6	intergenic	TNMD;TSPAN6
chrX	88241144	T	DEL	intergenic	ENSCAFG00000047952;U6	intergenic	LOC111094671;LOC111094672
chrX	109000904	C	L1Y	ncRNA_intronic	FGF13	intronic	FGF13
